# Supplementary material for: Plasma Vitamin C and Cancer Mortality in Kidney Transplant Recipients
Source: MDPI journal article supplement (doi:10.3390/jcm8122064), 2019-11-23

## TABLE OF CONTENTS

**Table S1.** Death-related type of cancer.

**Table S2.** Association of plasma vitamin C with cancer mortality, all models.

**Table S3.** Interaction analyses for potential confounders on the association of vitamin C with cancer mortality.

**Table S4.** Sensitivity analysis; association of plasma vitamin C with cancer mortality in 598 kidney transplant recipients, censored for graft-failure.

**Table S5.** Sensitivity analysis; association of plasma vitamin C with cardiovascular mortality in 598 kidney transplant recipients, censored for graft-failure.

**Table S6.** Sensitivity analysis; association of plasma vitamin C with cancer mortality in 598 kidney transplant recipients, with HbA1c instead of diabetes mellitus as potential confounder.

**Figure S1.** Strobe flow diagram.

## TABLES

**Supplemental Table 1.** Death-related type of cancer.

| Type of cancer                               | Number of events |
|----------------------------------------------|------------------|
| Breast cancer                                | 2                |
| Post-transplant lymphoproliferative disorder | 2                |
| Small cell lung cancer                       | 2                |
| Unknown primary                              | 1                |
| Bladder carcinoma                            | 1                |
| T-cell acute lymphocytic leukemia            | 1                |
| Anaplastic oligodendroglioma                 | 1                |
| Parotid cancer                               | 1                |
| Undifferentiated bronchial carcinoma         | 1                |
| Myelodysplastic syndrome                     | 1                |
| Glioblastoma multiforme                      | 1                |
| Prostate cancer                              | 1                |
| Pancreatic head carcinoma                    | 1                |
| Undifferentiated synovial sarcoma            | 1                |
| Squamous cell carcinoma, metastatic          | 1                |
| Ovarian carcinoma, metastatic                | 1                |
| Renal cell carcinoma                         | 1                |
| Hepatocellular carcinoma                     | 1                |
| Merkel cell carcinoma                        | 1                |
| Colorectal adenocarcinoma                    | 1                |
| Hodgkin lymphoma                             | 1                |
| Esophageal adenocarcinoma                    | 1                |
| Not available*                               | 7                |

**Supplemental Table 2.** Primary prospective analysis. Cox proportional hazards regression of cancer mortality, all models.

| Variables in the equation                                        | HR   | 95% CI    | P Value |
|------------------------------------------------------------------|------|-----------|---------|
| <b>Crude</b>                                                     |      |           |         |
| Vitamin C, $\mu\text{mol/L}$                                     | 0.63 | 0.43-0.92 | 0.02    |
| <b>Model 1</b>                                                   |      |           |         |
| Vitamin C, $\mu\text{mol/L}$                                     | 0.61 | 0.43-0.87 | 0.01    |
| Age, years                                                       | 1.06 | 1.03-1.10 | 0.01    |
| Sex, male                                                        | 0.36 | 0.17-0.76 | 0.01    |
| Smoking status                                                   | 1.47 | 0.69-3.15 | 0.32    |
| <b>Model 2</b>                                                   |      |           |         |
| Vitamin C, $\mu\text{mol/L}$                                     | 0.52 | 0.35-0.75 | 0.01    |
| Age, years                                                       | 1.06 | 1.03-1.10 | 0.01    |
| Sex, male                                                        | 0.31 | 0.14-0.67 | 0.01    |
| Smoking status                                                   | 1.58 | 0.72-3.48 | 0.25    |
| estimated Glomerular Filtration Rate, mL/min/1.73 m <sup>2</sup> | 1.00 | 0.98-1.02 | 0.98    |
| Dialysis vintage, months                                         | 0.98 | 0.96-0.99 | 0.02    |
| Time since transplantation, years                                | 1.02 | 0.97-1.07 | 0.51    |
| Proteinuria $\geq 0.5$ g/24 h                                    | 0.93 | 0.40-2.16 | 0.87    |
| <b>Model 3</b>                                                   |      |           |         |
| Vitamin C, $\mu\text{mol/L}$                                     | 0.50 | 0.34-0.74 | <0.001  |
| Age, years                                                       | 1.06 | 1.03-1.10 | 0.01    |
| Sex, male                                                        | 0.29 | 0.13-0.65 | 0.01    |
| Smoking status                                                   | 1.50 | 0.67-3.34 | 0.32    |
| estimated Glomerular Filtration Rate, mL/min/1.73 m <sup>2</sup> | 1.00 | 0.98-1.03 | 0.88    |
| Dialysis vintage, months                                         | 0.98 | 0.96-1.00 | 0.02    |
| Time since transplantation, years                                | 1.02 | 0.97-1.08 | 0.46    |
| Proteinuria $\geq 0.5$ g/24 h                                    | 1.00 | 0.42-2.36 | 0.99    |
| Fruit intake, servings/day                                       | 1.04 | 0.78-1.38 | 0.80    |
| Vegetable intake, tablespoons/day                                | 1.28 | 0.91-1.79 | 0.15    |
| <b>Model 4</b>                                                   |      |           |         |
| Vitamin C, $\mu\text{mol/L}$                                     | 0.49 | 0.33-0.72 | <0.001  |
| Age, years                                                       | 1.06 | 1.03-1.10 | 0.01    |
| Sex, male                                                        | 0.29 | 0.13-0.66 | 0.01    |
| Smoking status                                                   | 1.52 | 0.67-3.44 | 0.32    |
| estimated Glomerular Filtration Rate, mL/min/1.73 m <sup>2</sup> | 1.00 | 0.97-1.02 | 0.90    |
| Dialysis vintage, months                                         | 0.98 | 0.96-1.00 | 0.01    |
| Time since transplantation, years                                | 1.02 | 0.97-1.08 | 0.49    |

|                                                                  |      |           |        |
|------------------------------------------------------------------|------|-----------|--------|
| Proteinuria $\geq 0.5$ g/24 h                                    | 0.98 | 0.41-2.33 | 0.96   |
| Fruit intake, servings/day                                       | 1.01 | 0.75-1.35 | 0.96   |
| Vegetable intake, tablespoons/day                                | 1.32 | 0.93-1.87 | 0.12   |
| Diabetes mellitus                                                | 1.10 | 0.48-2.53 | 0.82   |
| hs-CRP, mg/L                                                     | 1.00 | 0.97-1.03 | 0.85   |
| History of myocardial infarction                                 | 0.24 | 0.03-1.93 | 0.18   |
| History of cerebrovascular accident or transient ischemic attack | 1.52 | 0.44-5.34 | 0.51   |
| <b>Model 5</b>                                                   |      |           |        |
| Vitamin C, $\mu\text{mol/L}$                                     | 0.55 | 0.38-0.80 | 0.002  |
| Age, years                                                       | 1.07 | 1.03-1.11 | 0.01   |
| Sex, male                                                        | 0.28 | 0.12-0.63 | 0.01   |
| Smoking status                                                   | 1.50 | 0.65-3.46 | 0.34   |
| estimated Glomerular Filtration Rate, mL/min/1.73 m <sup>2</sup> | 1.00 | 0.98-1.03 | 0.97   |
| Dialysis vintage, months                                         | 0.97 | 0.96-0.99 | 0.01   |
| Time since transplantation, years                                | 0.85 | 0.70-1.03 | 0.10   |
| Proteinuria $\geq 0.5$ g/24 h                                    | 0.78 | 0.32-1.91 | 0.59   |
| Fruit intake, servings/day                                       | 0.90 | 0.66-1.23 | 0.51   |
| Vegetable intake, tablespoons/day                                | 1.38 | 0.96-1.98 | 0.08   |
| Use of cyclosporine                                              | 0.31 | 0.11-0.91 | 0.03   |
| Use of tacrolimus                                                | 0.36 | 0.08-1.76 | 0.21   |
| Use of azathioprine                                              | 1.90 | 0.60-5.97 | 0.28   |
| Use of mycophenolic acid                                         | 0.61 | 0.17-2.17 | 0.45   |
| Use of mammalian target of rapamycin inhibitors                  | 0.00 | 0.00-1.61 | 0.97   |
| Cumulative dose of prednisolone, g                               | 1.03 | 0.98-1.09 | 0.28   |
| <b>Model 6</b>                                                   |      |           |        |
| Vitamin C, $\mu\text{mol/L}$                                     | 0.47 | 0.32-0.70 | <0.001 |
| Age, years                                                       | 1.06 | 1.03-1.10 | 0.001  |
| Sex, male                                                        | 0.27 | 0.12-0.63 | 0.002  |
| Smoking status                                                   | 1.56 | 0.70-3.51 | 0.28   |
| estimated Glomerular Filtration Rate, mL/min/1.73 m <sup>2</sup> | 1.00 | 0.98-1.03 | 0.80   |
| Dialysis vintage, months                                         | 0.98 | 0.96-1.00 | 0.02   |
| Time since transplantation, years                                | 0.95 | 0.83-1.08 | 0.40   |
| Proteinuria $\geq 0.5$ g/24 h                                    | 0.90 | 0.37-2.15 | 0.81   |
| Fruit intake, servings/day                                       | 1.04 | 0.78-1.40 | 0.80   |
| Vegetable intake, tablespoons/day                                | 1.29 | 0.92-1.82 | 0.15   |
| Transplantation era 1968-1989                                    |      |           | 0.32   |
| Transplantation era 1989-1996                                    | 2.50 | 0.76-8.27 | 0.13   |
| Transplantation era 1997-2002                                    | 4.64 | 0.49-43.6 | 0.18   |

**Supplemental Table 3.** Interaction analyses for potential confounders on the association of vitamin C with cancer mortality.

| Potential confounders                                            | Vitamin C (Log <sub>2</sub> ), continuous (μmol/L) |
|------------------------------------------------------------------|----------------------------------------------------|
|                                                                  | <i>P</i> <sub>int</sub>                            |
| Age, years                                                       | 0.43                                               |
| Sex, male                                                        | 0.64                                               |
| estimated Glomerular Filtration Rate, mL/min/1.73 m <sup>2</sup> | 0.23                                               |
| Time since transplantation, years                                | 0.97                                               |
| Dialysis vintage, months                                         | 0.84                                               |
| Fruit intake, servings/day                                       | 0.56                                               |
| Vegetable intake, tablespoons/day                                | 0.29                                               |
| Current or ex-smoker                                             | 0.45                                               |
| hs-CRP, mg/L                                                     | 0.60                                               |
| Use of cyclosporine                                              | 0.13                                               |
| Use of tacrolimus                                                | 0.16                                               |
| Use of azathioprine                                              | 0.20                                               |
| Use of mycophenolic acid                                         | 0.21                                               |
| Use of mammalian target of rapamycin inhibitors                  | 1.00                                               |
| Cumulative dose of prednisolone, g                               | 0.86                                               |
| Transplantation era                                              | 0.99                                               |

**Supplemental Table 4.** Sensitivity analysis; association of plasma vitamin C with cancer mortality in 598 kidney transplant recipients, censored for graft failure.

| Models         | Vitamin C (Log <sub>e</sub> ), continuous (μmol/L) |           |         |
|----------------|----------------------------------------------------|-----------|---------|
|                | HR                                                 | 95% CI    | P Value |
| <b>Crude</b>   | 0.66                                               | 0.45–0.97 | 0.034   |
| <b>Model 1</b> | 0.63                                               | 0.44–0.91 | 0.014   |
| <b>Model 2</b> | 0.53                                               | 0.36–0.78 | 0.001   |
| <b>Model 3</b> | 0.51                                               | 0.34–0.76 | 0.001   |
| <b>Model 4</b> | 0.50                                               | 0.33–0.76 | 0.001   |
| <b>Model 5</b> | 0.56                                               | 0.38–0.82 | 0.003   |
| <b>Model 6</b> | 0.49                                               | 0.32–0.73 | 0.001   |

Cox proportional hazards regression analyses were performed to assess the association of plasma vitamin C with cancer mortality. Model 1: adjustment for age, sex and smoking status. Model 2: Model 1 + adjustment for estimated Glomerular Filtration Rate, dialysis vintage, time since transplantation and proteinuria. Model 3: Model 2 + adjustment for fruit and vegetable intake. Model 4: Model 3 + adjustment for diabetes mellitus, high-sensitivity C-reactive protein and prior history of cardiovascular disease. Model 5: Model 3 + adjustment for immunosuppressive therapy. Model 6: Model 3 + adjustment for transplantation era. Abbreviations: HR, hazard ratio; CI, confidence interval.

**Supplemental Table 5.** Sensitivity analysis; association of plasma vitamin C with cardiovascular mortality in 598 kidney transplant recipients, censored for graft failure.

| Models         | Vitamin C (Log <sub>e</sub> ), continuous (μmol/L) |           |         |
|----------------|----------------------------------------------------|-----------|---------|
|                | HR                                                 | 95% CI    | P Value |
| <b>Crude</b>   | 0.96                                               | 0.69–1.34 | 0.80    |
| <b>Model 1</b> | 0.98                                               | 0.71–1.37 | 0.93    |
| <b>Model 2</b> | 1.04                                               | 0.74–1.48 | 0.81    |
| <b>Model 3</b> | 1.19                                               | 0.83–1.71 | 0.34    |
| <b>Model 4</b> | 1.36                                               | 0.93–1.97 | 0.11    |
| <b>Model 5</b> | 1.24                                               | 0.86–1.77 | 0.25    |
| <b>Model 6</b> | 1.19                                               | 0.83–1.70 | 0.34    |

Cox proportional hazards regression analyses were performed to assess the association of plasma vitamin C with cardiovascular mortality. Model 1: adjustment for age, sex and smoking status. Model 2: Model 1 + adjustment for estimated Glomerular Filtration Rate, dialysis vintage, time since transplantation and proteinuria. Model 3: Model 2 + adjustment for fruit and vegetable intake. Model 4: Model 3 + adjustment for diabetes mellitus, high-sensitivity C-reactive protein and prior history of cardiovascular disease. Model 5: Model 3 + adjustment for immunosuppressive therapy. Model 6: Model 3 + adjustment for transplantation era. Abbreviations: HR, hazard ratio; CI, confidence interval.

**Supplemental Table 6.** Sensitivity analysis; association of plasma vitamin C with cancer mortality in 598 kidney transplant recipients, with HbA1c instead of diabetes mellitus as potential confounder.

| Models         | Vitamin C (Log <sub>2</sub> ), continuous (μmol/L) |           |         |
|----------------|----------------------------------------------------|-----------|---------|
|                | HR <sup>a</sup>                                    | 95% CI    | P Value |
| <b>Crude</b>   | 0.63                                               | 0.43–0.92 | 0.016   |
| <b>Model 1</b> | 0.61                                               | 0.43–0.87 | 0.006   |
| <b>Model 2</b> | 0.52                                               | 0.35–0.75 | 0.001   |
| <b>Model 3</b> | 0.50                                               | 0.34–0.74 | <0.001  |
| <b>Model 4</b> | 0.48                                               | 0.32–0.71 | <0.001  |
| <b>Model 5</b> | 0.55                                               | 0.38–0.80 | 0.002   |
| <b>Model 6</b> | 0.47                                               | 0.32–0.70 | <0.001  |

Cox proportional hazards regression analyses were performed to assess the association of plasma vitamin C with cancer mortality. Model 1: adjustment for age, sex and smoking status. Model 2: Model 1 + adjustment for estimated Glomerular Filtration Rate, dialysis vintage, time since transplantation and proteinuria. Model 3: Model 2 + adjustment for fruit and vegetable intake. Model 4: Model 3 + adjustment for HbA1c, high-sensitivity C-reactive protein and prior history of cardiovascular disease. Model 5: Model 3 + adjustment for immunosuppressive therapy. Model 6: Model 3 + adjustment for transplantation era. Abbreviations: HR, hazard ratio; CI, confidence interval.

<sup>a</sup> Each model hazard ratio is given per doubling of vitamin C concentration.



Supplemental Figure 1. STROBE flow diagram.

Supplemental Figure 1.

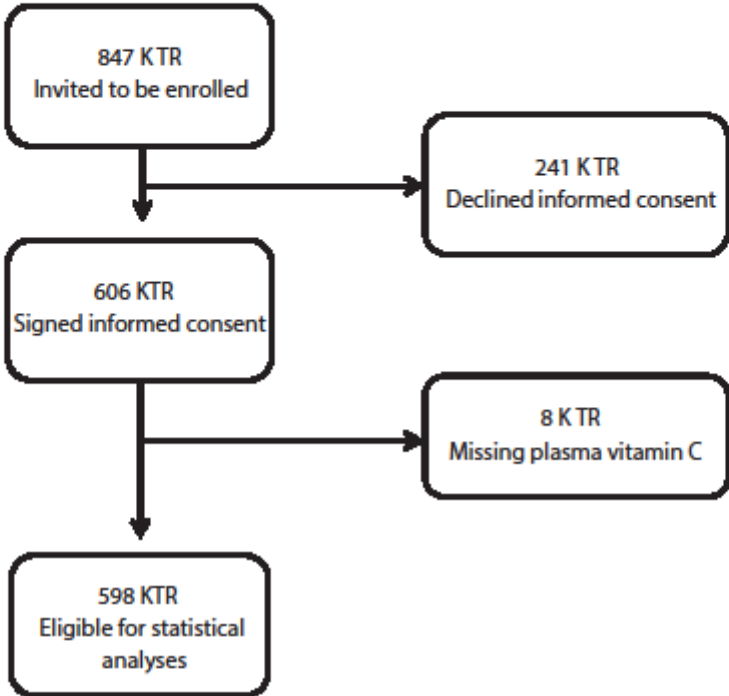

Supplement: s1 [file s1]
